# Supplementary material
Source: PubMed Central journal article supplement (PMC6217832)
Supplement: NIHMS964872-supplement-supplement_1.pdf [file NIHMS964872-supplement-supplement_1.pdf]

## Electronic Supplementary Material

# General synthesis of silica-based yolk/shell hybrid nanomaterials and *in vivo* tumor vasculature targeting

Feng Chen<sup>1</sup>, Shreya Goel<sup>2</sup>, Sixiang Shi<sup>2</sup>, Todd E. Barnhart<sup>3</sup>, Xiaoli Lan<sup>4</sup> (✉), and Weibo Cai<sup>1,2,3,5</sup> (✉)

<sup>1</sup> Department of Radiology, University of Wisconsin-Madison, WI 53705, USA

<sup>2</sup> Materials Science Program, University of Wisconsin-Madison, WI 53705, USA

<sup>3</sup> Department of Medical Physics, University of Wisconsin-Madison, WI 53705, USA

<sup>4</sup> Department of Nuclear Medicine, Union Hospital, Tongji Medical College, Huazhong University of Science and Technology, Wuhan 430022, China

<sup>5</sup> University of Wisconsin Carbone Cancer Center, Madison, WI 53705, USA

Supporting information to <https://doi.org/10.1007/s12274-018-2078-9>

### SUPPLEMENTARY FIGURES

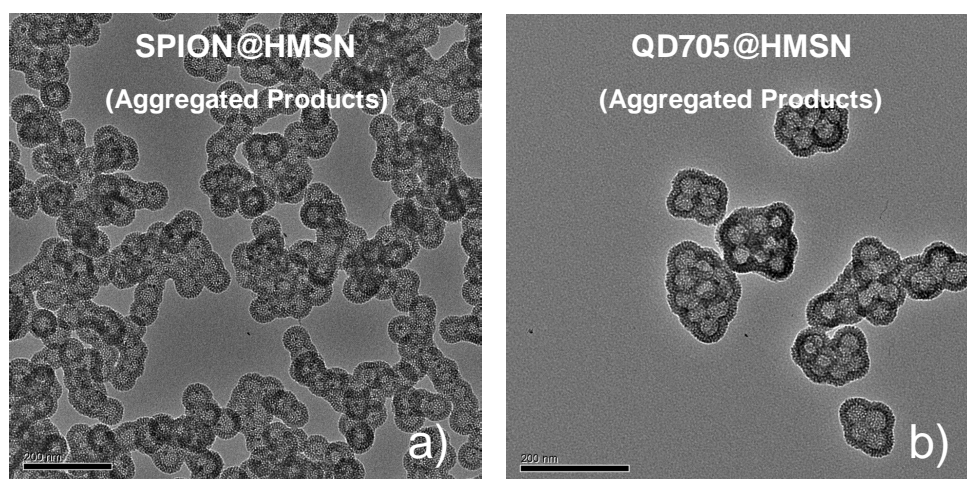

**Figure S1** TEM images of (a) SPION@HMSN and (b) QD705@HMSN with severe nanoparticle aggregations.

Address correspondence to Xiaoli Lan, LXL730724@hotmail.com; Weibo Cai, wcai@uwhealth.org

## SUPPLEMENTARY TABLES

**Table S1**  $^{89}\text{Zr}$ -labeling yields of UCNP@HMSN at 75 °C in solutions with different pH values

|             | 0.5 h  | 1 h    | 3 h    | 9 h    | 22 h   |
|-------------|--------|--------|--------|--------|--------|
| 75 °C, pH 8 | 65.3 % | 74.9 % | 84.2 % | 87.4 % | 90.4 % |
| 75 °C, pH 2 | 1.2 %  | 1.3 %  | 1.8 %  | 1.4 %  | 0.6 %  |

**Table S2**  $^{89}\text{Zr}$ -labeling yields of UCNP@HMSN at 37 °C in solutions with pH 8

|            | 2 h    | 4 h    | 6 h    | 22 h   |
|------------|--------|--------|--------|--------|
| 37°C, pH 8 | 42.1 % | 58.8 % | 71.1 % | 82.4 % |

**Table S3** Region-of-interest (ROI) quantitative analysis of PET images from targeted group mice injected with UCNP@[ $^{89}\text{Zr}$ ]HMSN-PEG<sub>5k</sub>-TRC105 (n=3).

| Targeted (n=3) | Liver |      | Blood |      | Tumor |      | Muscle |      |
|----------------|-------|------|-------|------|-------|------|--------|------|
|                | Ave.  | Std. | Ave.  | Std. | Ave.  | Std. | Ave.   | Std. |
| 0.5 h          | 20.73 | 0.70 | 22.60 | 3.72 | 2.43  | 0.31 | 0.88   | 0.28 |
| 6 h            | 26.30 | 2.52 | 9.10  | 4.28 | 10.03 | 0.90 | 0.60   | 0.20 |
| 24 h           | 29.83 | 3.39 | 1.77  | 0.49 | 9.63  | 0.60 | 0.53   | 0.09 |
| 48 h           | 32.30 | 4.85 | 0.84  | 0.10 | 9.50  | 0.92 | 0.52   | 0.08 |

**Table S4** ROI quantitative analysis of PET images from non-targeted group mice injected with UCNP@[ $^{89}\text{Zr}$ ]HMSN-PEG<sub>5k</sub> (n=3).

| Non-targeted (n=3) | Liver |      | Blood |      | Tumor |      | Muscle |      |
|--------------------|-------|------|-------|------|-------|------|--------|------|
|                    | Ave.  | Std. | Ave.  | Std. | Ave.  | Std. | Ave.   | Std. |
| 0.5 h              | 26.60 | 2.69 | 30.50 | 1.56 | 2.15  | 0.35 | 0.74   | 0.18 |
| 6 h                | 46.70 | 1.27 | 5.40  | 1.13 | 4.15  | 1.20 | 0.37   | 0.10 |
| 24 h               | 57.70 | 1.70 | 0.86  | 0.01 | 4.70  | 1.98 | 0.23   | 0.01 |
| 48 h               | 54.95 | 2.76 | 0.39  | 0.07 | 4.30  | 1.56 | 0.32   | 0.12 |

**Table S5** ROI quantitative analysis of PET images from blocking group mice injected with UCNP@[ $^{89}\text{Zr}$ ]HMSN-PEG<sub>5k</sub>-TRC105 and 1 mg of free TRC105 antibody (n=3).

| Blocking (n=3) | Liver |      | Blood |      | Tumor |      | Muscle |      |
|----------------|-------|------|-------|------|-------|------|--------|------|
|                | Ave.  | Std. | Ave.  | Std. | Ave.  | Std. | Ave.   | Std. |
| 0.5 h          | 27.67 | 3.23 | 28.80 | 1.81 | 1.90  | 0.10 | 0.84   | 0.12 |
| 6 h            | 40.13 | 5.15 | 10.60 | 2.34 | 4.27  | 0.74 | 0.56   | 0.14 |
| 24 h           | 48.93 | 5.06 | 1.14  | 0.20 | 4.60  | 0.85 | 0.53   | 0.24 |
| 48 h           | 46.93 | 3.63 | 0.72  | 0.14 | 3.90  | 0.70 | 0.42   | 0.17 |

**Table S6** *Ex vivo* biodistribution data of  $^{89}\text{Zr}$ -radiolabeled yolk/shell nanoparticles at 48 h post-injection (n=3). The radioactivity in organs was measured using a gamma-counter and presented as %ID/g (mean  $\pm$  std.). Targeted group: UCNP@[ $^{89}\text{Zr}$ ]HMSN-PEG<sub>5k</sub>-TRC105; Non-targeted group: UCNP@[ $^{89}\text{Zr}$ ]HMSN-PEG<sub>5k</sub>; Blocking group: UCNP@[ $^{89}\text{Zr}$ ]HMSN-PEG<sub>5k</sub>-TRC105 with 1 mg of unlabeled TRC105 (each mouse).

|           | Targeted (n=3) Non |      | targeted (n=3) Blocking (n=3) |      | Targeted (n=3) Non |      |
|-----------|--------------------|------|-------------------------------|------|--------------------|------|
|           | Ave.               | Std. | Ave.                          | Std. | Ave.               | Std. |
| Blood     | 0.43               | 0.08 | 0.39                          | 0.21 | 0.45               | 0.26 |
| Skin      | 1.67               | 0.25 | 0.57                          | 0.25 | 0.46               | 0.13 |
| Muscle    | 0.25               | 0.14 | 0.33                          | 0.22 | 0.30               | 0.03 |
| Bone      | 3.10               | 1.20 | 3.43                          | 0.27 | 1.42               | 1.60 |
| Heart     | 0.69               | 0.28 | 0.36                          | 0.03 | 0.47               | 0.14 |
| Lung      | 0.65               | 0.72 | 0.70                          | 0.48 | 0.63               | 0.27 |
| Liver     | 30.12              | 1.85 | 38.37                         | 3.53 | 33.05              | 0.31 |
| Kidney    | 2.13               | 0.61 | 1.43                          | 0.16 | 2.28               | 0.57 |
| Spleen    | 21.00              | 0.68 | 25.03                         | 4.17 | 24.98              | 4.29 |
| Pancreas  | 0.62               | 0.12 | 0.25                          | 0.04 | 0.25               | 0.07 |
| Stomach   | 0.78               | 0.23 | 0.39                          | 0.11 | 0.68               | 0.42 |
| Intestine | 1.59               | 0.92 | 1.82                          | 1.41 | 1.48               | 0.89 |
| Tumor     | 5.37               | 0.19 | 2.41                          | 0.24 | 2.30               | 0.45 |
| Tail      | 1.74               | 0.22 | 2.32                          | 0.94 | 1.41               | 0.82 |
| Brain     | 0.14               | 0.10 | 0.06                          | 0.06 | 0.07               | 0.01 |
